# Supplementary material for: Thin Film Deposition of MoP, a Topological Semimetal
Source: MDPI journal article supplement (doi:10.3390/applnano4010003), 2023-02-24
Supplement: s1 [file s1]

Archive with 1 entries (1 files):
- applnano-2202167-supplementary.pdf
