# Supplementary figures and images for: Thin Film Deposition of MoP, a Topological Semimetal
Source: MDPI journal article supplement (doi:10.3390/applnano4010003), 2023-02-24

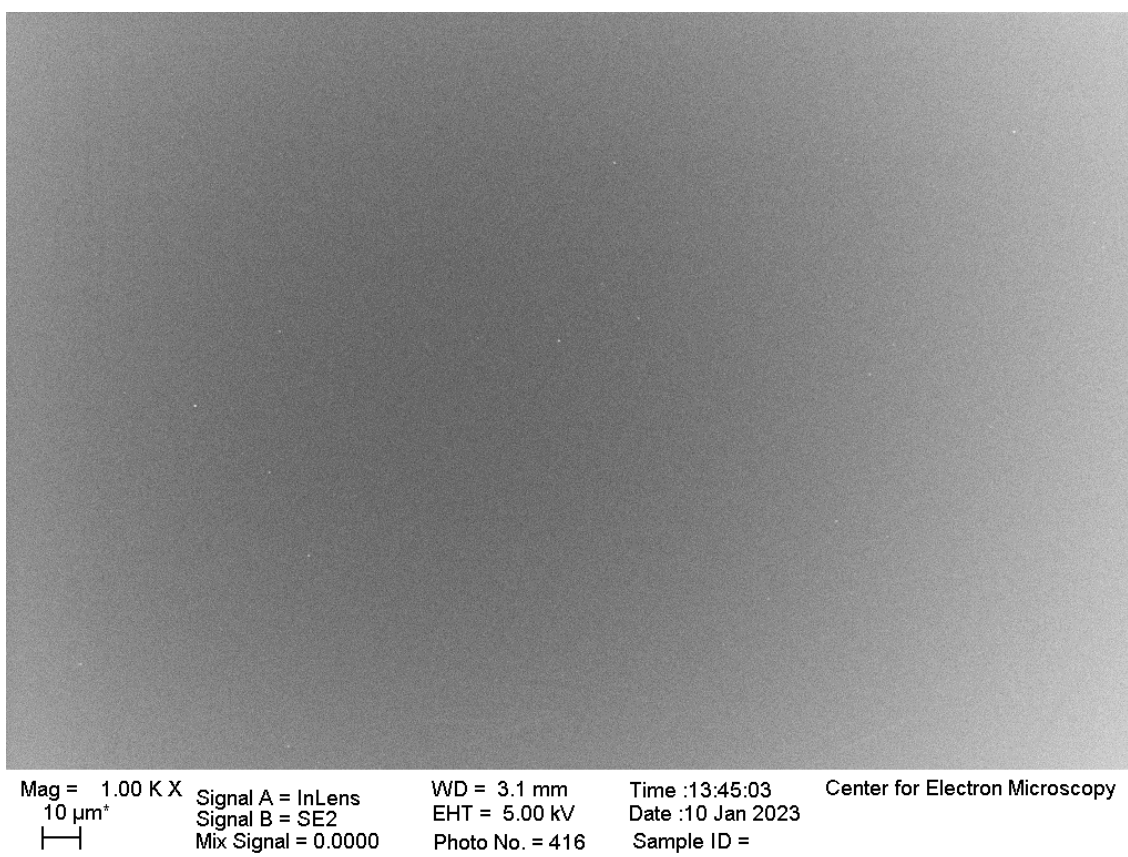

Figure S1: SEM image of the grown films.

Supplement: s1 [file s1]
